# Supplementary material
Source: publisher figshare collection journal article supplement (https://diabetesjournals.figshare.com/articles/dataset/_/13567922)
Supplement: Supplementary file 1 [file 1]

**Supplemental Table 1. Overview of treatment emergent adverse events in the safety population**

|                                                                         | <b>Imeglimin (n=106)</b> | <b>Placebo (n=107)</b> |
|-------------------------------------------------------------------------|--------------------------|------------------------|
| Patients with any TEAEs                                                 | 47 (44.2%)               | 48 (44.9%)             |
| Patients with mild TEAEs                                                | 44 (41.5%)               | 46 (43.0%)             |
| Patients with moderate TEAEs                                            | 5 (4.7%)                 | 4 (3.7%)               |
| Patients with severe TEAEs                                              | 2 (1.9%)                 | 1 (0.9%)               |
| Patients with any treatment related TEAEs                               | 5 (4.7%)                 | 7 (6.5%)               |
| Patients with any TEAEs leading to premature study drug discontinuation | 3 (2.8%)                 | 6 (5.6%)               |
| Patients with any SAE                                                   | 4 (3.8%)                 | 1 (0.9%)               |
| Femur fracture                                                          | 1 (0.9%)                 | 0                      |
| Lower limb fracture                                                     | 0                        | 1 (0.9%)               |
| Radius fracture                                                         | 1 (0.9%)                 | 0                      |
| Ileus                                                                   | 1 (0.9%)                 | 0                      |
| Bladder cancer                                                          | 1 (0.9%)                 | 0                      |
| Spondylotic myelopathy                                                  | 1 (0.9%)                 | 0                      |
| Death                                                                   | 0                        | 0                      |

Data are n (%).

**Supplemental Table 2. Gastrointestinal and hypoglycemic events in the safety population**

|                                              | <b>Imeglimin (n=106)</b> | <b>Placebo (n=107)</b> |
|----------------------------------------------|--------------------------|------------------------|
|                                              | <b>N (%) n</b>           | <b>N (%) n</b>         |
| <b>Gastrointestinal disorders</b>            | <b>12 (11.3%) 15</b>     | <b>9 (8.4%) 9</b>      |
| Constipation                                 | 2 (1.9%) 2               | 1 (0.9%) 1             |
| Dental Caries                                | 1 (0.9%) 1               | 2 (1.9%) 2             |
| Abdominal pain upper                         | 1 (0.9%) 1               | 1 (0.9%) 1             |
| Diarrhoea                                    | 1 (0.9%) 1               | 1 (0.9%) 1             |
| Duodenal ulcer                               | 0                        | 2 (1.9%) 2             |
| Faeces soft                                  | 0                        | 2 (1.9%) 2             |
| Gastritis                                    | 2 (1.9%) 2               | 0                      |
| Abdominal discomfort                         | 1 (0.9%) 1               | 0                      |
| Abdominal distension                         | 1 (0.9%) 1               | 0                      |
| Abdominal pain                               | 1 (0.9%) 1               | 0                      |
| Epigastric discomfort                        | 1 (0.9%) 1               | 0                      |
| Ileus                                        | 1 (0.9%) 1               | 0                      |
| Large intestine polyp                        | 1 (0.9%) 1               | 0                      |
| Periodontal disease                          | 1 (0.9%) 1               | 0                      |
| Vomiting                                     | 1 (0.9%) 1               | 0                      |
|                                              |                          |                        |
| <b>Hypoglycemia</b>                          | <b>3 (2.8%) 7</b>        | <b>1 (0.9%) 2</b>      |
| Documented symptomatic hypoglycemia          | 1 (0.9%) 2               | 0                      |
| Asymptomatic hypoglycemia reported from SMBG | 2 (1.9%) 5               | 1 (0.9%) 2             |
| Severe hypoglycemia                          | 0                        | 0                      |

N: Number of patients; n: number of events

**Supplemental Table 3. Baseline and end-of-treatment values of lipid parameters**

|                                   | <b>Imeglimin (n=106)</b> | <b>Placebo (n=106)</b> |
|-----------------------------------|--------------------------|------------------------|
|                                   | Mean (SD)                | Mean (SD)              |
| <b>Total cholesterol (mmol/L)</b> |                          |                        |
| Baseline                          | 5.019 (0.92)             | 5.198 (0.84)           |
| Week 24                           | 5.161 (0.94)             | 5.123 (0.84)           |
| <b>LDL-c (mmol/L)</b>             |                          |                        |
| Baseline                          | 2.887 (0.84)             | 2.998 (0.76)           |
| Week 24                           | 3.041 (0.84)             | 2.946 (0.75)           |
| <b>HDL-c (mmol/L)</b>             |                          |                        |
| Baseline                          | 1.435 (0.46)             | 1.451 (0.41)           |
| Week 24                           | 1.405 (0.43)             | 1.456 (0.49)           |
| <b>Triglycerides (mmol/L)</b>     |                          |                        |
| Baseline                          | 1.525 (0.77)             | 1.771 (1.54)           |
| Week 24                           | 1.563 (0.78)             | 1.717 (1.78)           |
