# Supplementary material
Source: publisher figshare collection journal article supplement (https://diabetesjournals.figshare.com/articles/dataset/_/13567922)
Supplement: Supplementary file 2 [file 1]

**TIMES 1 trial investigators**

Keitoku Matsumoto, Yoji Takatsuka, Tomio Tsukazaki, Akiyoshi Uchiyama,  
Yoshikazu Shibasaki, Shinya Minagawa, Kazunori Ogino, Akira Numata, Atsuko Abe, Kazuo  
Suzuki, Kiyomitsu Ikeoka, Shinya Nagamatsu, Susumu Ishikawa, Jyoji Kurokawa,  
Michio Eguchi, Izumi Tsunematsu, Tetsuya Kawahara, Shinichi  
Tanaka, Arihiro Kiyosue, Takafumi Oga, Yasushi Fukushima, Hiroshi Shudo, Yoshino  
Arai, Daigaku Uchida, Masaya Kino, Koji Kamada, Hideaki Tanaka, Seitaro Nakama,  
Yasuhiro Terashima, Seiho Shu, Yusuke Fujino, Atsushi Hasegawa, Yoshihide Fukumoto
